# Supplementary material for: Inorganic halogen ligands in quantum dots: I−, Br−, Cl− and film fabrication through electrophoretic deposition
Source: Royal Society of Chemistry journal article supplement (doi:10.1039/c3cp52678j), 2013-01-01
Supplement: c3cp52678j.pdf [file c3cp52678j.pdf]

## Supporting Information

$$\text{For the formula } E_{\text{gap}} = E_{\text{bulk}} + \frac{h^2}{8R^2} \left( \frac{1}{m_e} + \frac{1}{m_h} \right) - \frac{1.8e^2}{\epsilon R}$$

$E_{\text{bulk}}$  is the band gap of bulk materials ( $E_{\text{CdSe}}=1.84$  eV,  $h$  is Plank constant,  $R$  means the radius of quantum dots,  $m_e$  is the effective mass of electron (for CdSe,  $m_e=0.13m_0$ ,  $m_0=9.1 \times 10^{-31}$  kg),  $m_h$  is the effective mass of hole (for CdSe,  $m_h=0.3m_0$ ),  $\epsilon$  is the semiconductor dielectric constant (for CdSe,  $\epsilon=9.56$ ),  $e=1.6 \times 10^{-19}$  c.

Then we could get the relationship of  $E_{\text{gap}}$  with  $R$ . By solving the equation,  $R$  is 1.35 nm and the diameter is 2.7 nm.

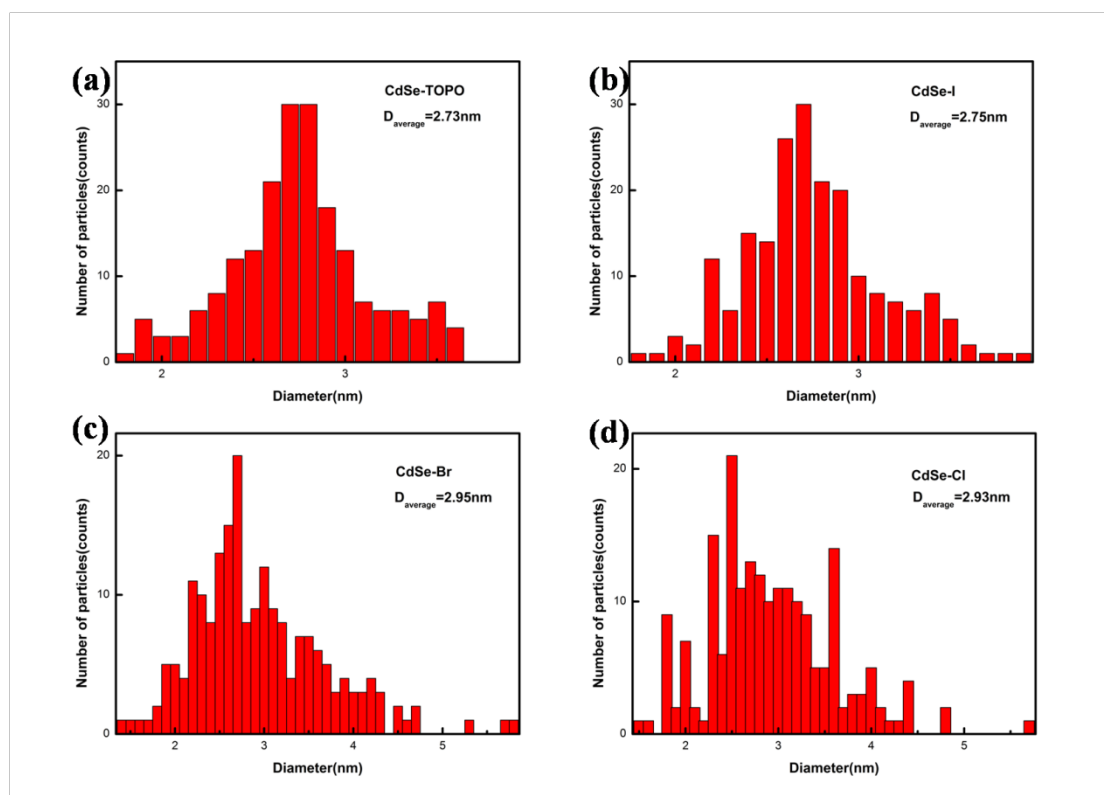

**Fig S1 Size distribution histograms of CdSe QDs capped with different ligands: (a) TOPO ligands, (b) I ligands, (c) Br<sup>-</sup> ligands, (d) Cl ligands.**

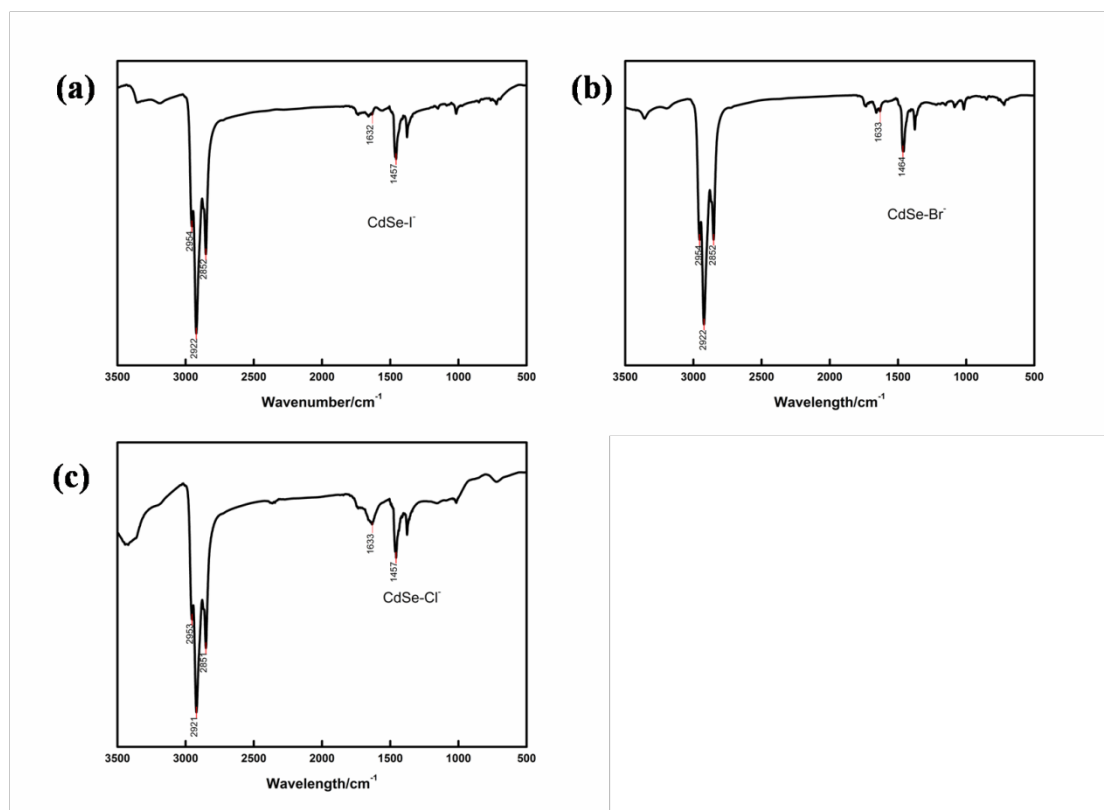

**Fig S2** FTIR spectra of the upper clear liquor during ligand exchange: (a) I<sup>-</sup> ligands, (b) Br<sup>-</sup> ligands, (c) Cl<sup>-</sup> ligands.

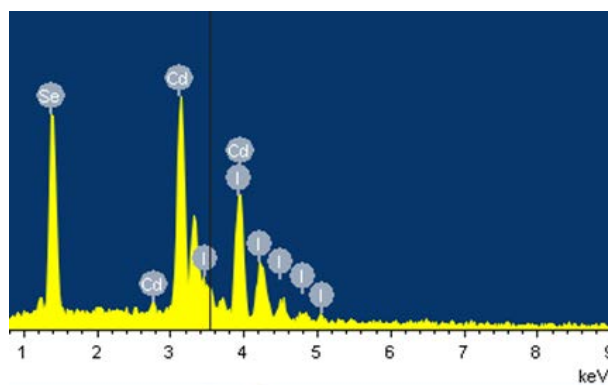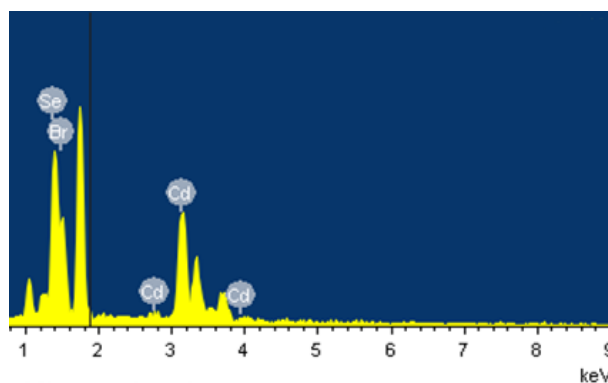

(b) CdSe QDs with Br<sup>-</sup> ligands

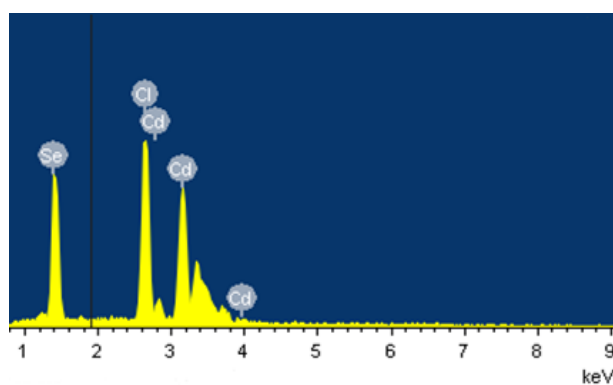

(c) CdSe QDs with Cl<sup>-</sup> ligands

Figure S3 EDX results of CdSe QDs with different halogen ion ligands.

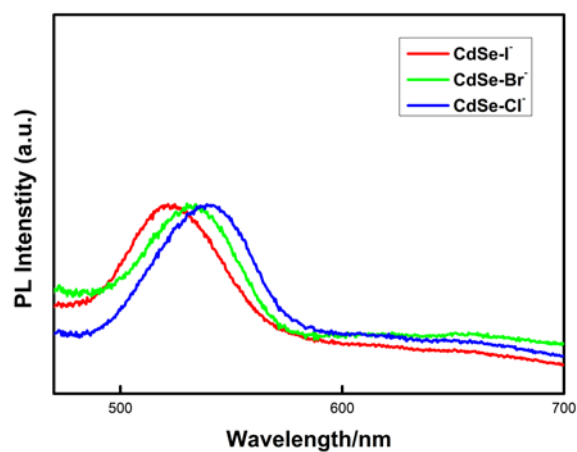

Figure S4 Photoluminescence spectra of CdSe QDs with different inorganic ligands

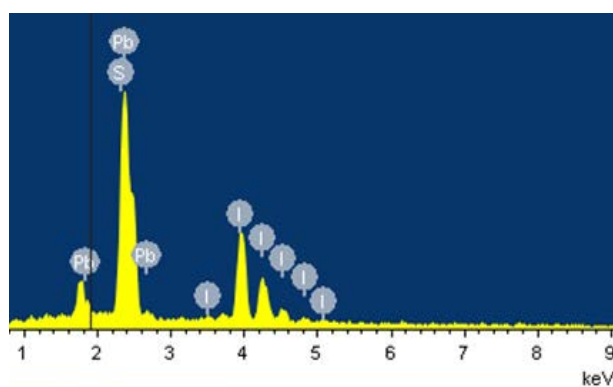

(a) PbS QDs with I<sup>-</sup> ligands

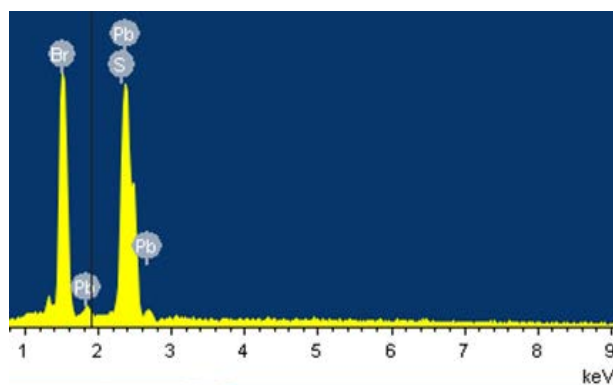

(b) PbS QDs with Br<sup>-</sup> ligands

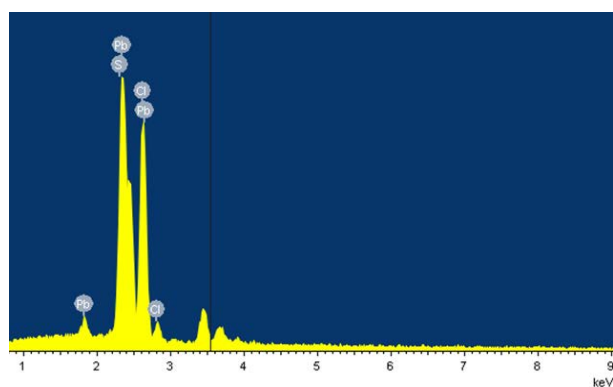

(c) PbS QDs with Cl<sup>-</sup> ligands

Figure S5 EDX results of PbS QDs after ligand exchange

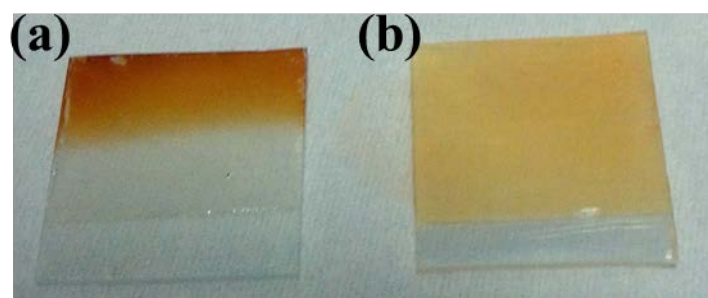

Figure S6 Photographs of TiO<sub>2</sub> films sensitized by CdSe QDs. (a) EPD method of I<sup>-</sup> capped QDs; (b) Direct adsorption of TOPO capped QDs.
